# Supplementary material
Source: PubMed Central journal article supplement (PMC3896876)
Supplement: NIHMS546573-supplement-01.pdf [file NIHMS546573-supplement-01.pdf]

**Supplementary Table E1.** Comparison of small intestinal histopathology classifications

| <i>Classification used in this project</i> | <i>Villous atrophy</i> |                      |                    |
|--------------------------------------------|------------------------|----------------------|--------------------|
| Marsh Classification [28]                  | Type IIIa              | Type IIIb            | Type IIIc          |
| Marsh Description                          | Flat destructive       |                      |                    |
| Corazza Classification [38]                | Grade B1               |                      | Grade B2           |
| SnoMed Codes                               | M58, D6218, M58005     | M58, D6218, M58006   | M58, D6218, M58007 |
| KVAST/Alexander classification             | III<br>Partial VA      | IV<br>Subtotal<br>VA | IV<br>Total VA     |
| <i>Characteristics</i>                     |                        |                      |                    |
| Villous atrophy                            | +                      | ++                   | ++                 |
| Increased intraepithelial lymphocytes      | +                      | +                    | +                  |
| Crypt hyperplasia                          | +                      | ++                   | ++                 |
